# Supplementary material
Source: Elsevier journal article supplement (https://www.sciencedirect.com/science/article/pii/S0214460320300565)
Supplement: mmc1 [file S0214460320300565:mmc1.docx]

**Anexo 1. Clasificación de los ítems de EdP, mostrando el número de ítem y la palabra (CELF-4).**

| Tipo de Palabra | |
| --- | --- |
| Sustantivas | 4) Flores; 5) Árboles; 6) Peces. |
| Verbos | 7) Pintan; 8) Se visten, 1) Está dormido; 2) Es grande; 11) Escribe; 12) Dibuja; 13) Lee; 22) Va a visitar; 23) Va a ir; 26) Compraría; 27) Podría; 16) Tome; 17) La peine; 28) Ganara; 29) Tuviera. 14) Escribió; 15) Dibujó; 18) Hizo; 19) Dieron. |
| Derivadas | 20) Nadadora; 21) Patinador; 24) Salado; 25) Jugosa. |
| Pronombres | 9) De ella;10) De ellos) 3) Bañándose |

**Anexo 2. Clasificación de los ítems incluidos en la prueba EdO del CELF-4.**

| Oraciones simples | Clasificación de la oración |
| --- | --- |
| 1. El niño no está escribiendo | Negativa |
| 2. La niña tiene un perro pequeño con manchas negras | Afirmativa |
| 7. La niña preguntó: ¿Dónde escondieron mi osito? | Interrogativa |
| 8. La niña no está jugando con cubos | Negativa |
| 9. La mujer preguntó: ¿Cuánto cuestan éstas tazas? | Interrogativa |
| 11. Ella no está lista para la escuela | Negativa |
| 12. El joven preguntó: ¿Cuánto cuesta ésta cámara? | Interrogativa |
| 13. El pato se está alejando de la niña | Afirmativa |
| 16. Las muchachas ya han lavado el coche | Afirmativa |
| 18. Los niños están sentados detrás de su papá | Afirmativa |
| 20. El papá le mostró el bebé a la abuelita | Afirmativa |
| 21. Mamá preguntó: ¿No deberías tener puestos los zapatos? | Interrogativa |
| 23. El niño está sentando al bebé en el cochecito | Afirmativa |
| 24. Mamá dijo: Por favor friega el suelo de la cocina | Afirmativa |
| 26. La niña va a caminar de la tienda a su casa | Afirmativa |
| 29. El niño está subiendo la rampa | Afirmativa |
| 31. La mamá va a dar de comer al bebé | Afirmativa |
| Oraciones compuestas | **Clasificación de la oración** |
| 3. El niño está llorando porque se lastimó la rodilla. | Subordinada |
| 4. A ellos les gusta comer galletas y beber zumo. | Coordinada - copulativa |
| 5. Él está subiéndose y ella está columpiándose. | Coordinada - copulativa |
| 6. Él está listo para vestirse. | Subordinada |
| 10. La niña que está parada al final de la fila lleva una mochila. | Subordinada |
| 14. La niña llevó a su mamá a ver las flores. | Subordinada |
| 15. La niña está esperando para subirse en el bus pero los otros niños están jugando. | Coordinada - adversativa |
| 17. Él se comió las galletas antes de tomarse el zumo. | Subordinada |
| 19. Él va ayudar a su mamá a levantar el sofá. | Subordinada |
| 22. El niño está lavando los platos y la señora está secando los platos. | Coordinada - copulativa |
| 25. El niño que está sentado cerca del árbol pequeño se está comiendo una manzana. | Subordinada |
| 27. Los dos niños mayores han terminado de comer pero el más pequeño todavía está comiendo. | Coordinada - adversativa |
| 28. A la señora que trae la compra se le cayó la bolsa. | Subordinada |
| 30. La niña tiene puestas sus gafas de sol aunque no las necesita. | Coordinada - adversativa |

|  | Subtipo de frase | | |
| --- | --- | --- | --- |
| Simple | Afirmativas | Negativas | Interrogativas |
| 2, 13, 16, 18, 20, 23, 24, 26, 29, 31 | 1, 8, 11 | 7, 9, 12, 21 |
| Compuesta | Subordinadas | Coordinadas adversativas | Coordinadas copulativas |
| 3, 6, 10, 14, 17, 19, 25, 28 | 15, 27, 30 | 4, 5, 22 |

**Anexo 3. Clasificación de los ítems incluidos en la prueba FO del CELF-4.**

| Subtipo de frase | |
| --- | --- |
| Simple | 1) Niños; 2) Escuela; 3) Corriendo; 4) La niña más pequeña; 5) El animal más grande; 6) Por fin; 7) Rápidamente; 8) Caminando; 9) Nunca; 10) Tercera; 11) Mejor; 18) Cualquier. |
| Compuesta | 12) En vez de; 13) Mientras; 14) Antes; 15) Al mismo tiempo; 16) Y; 17) Aunque; 19) Hasta que; 20) A menos que; 21) A pesar de que; 22) Pero; 23) O |
